# Supplementary material for: Prostaglandin D2-supplemented “functional eicosanoid testing and typing” assay with peripheral blood leukocytes as a new tool in the diagnosis of systemic mast cell activation disease: an explorative diagnostic study
Source: Springer Nature journal article supplement (doi:10.1186/s12967-014-0213-2), 2014-08-11
Supplement: MOESM4 [file 9766288]

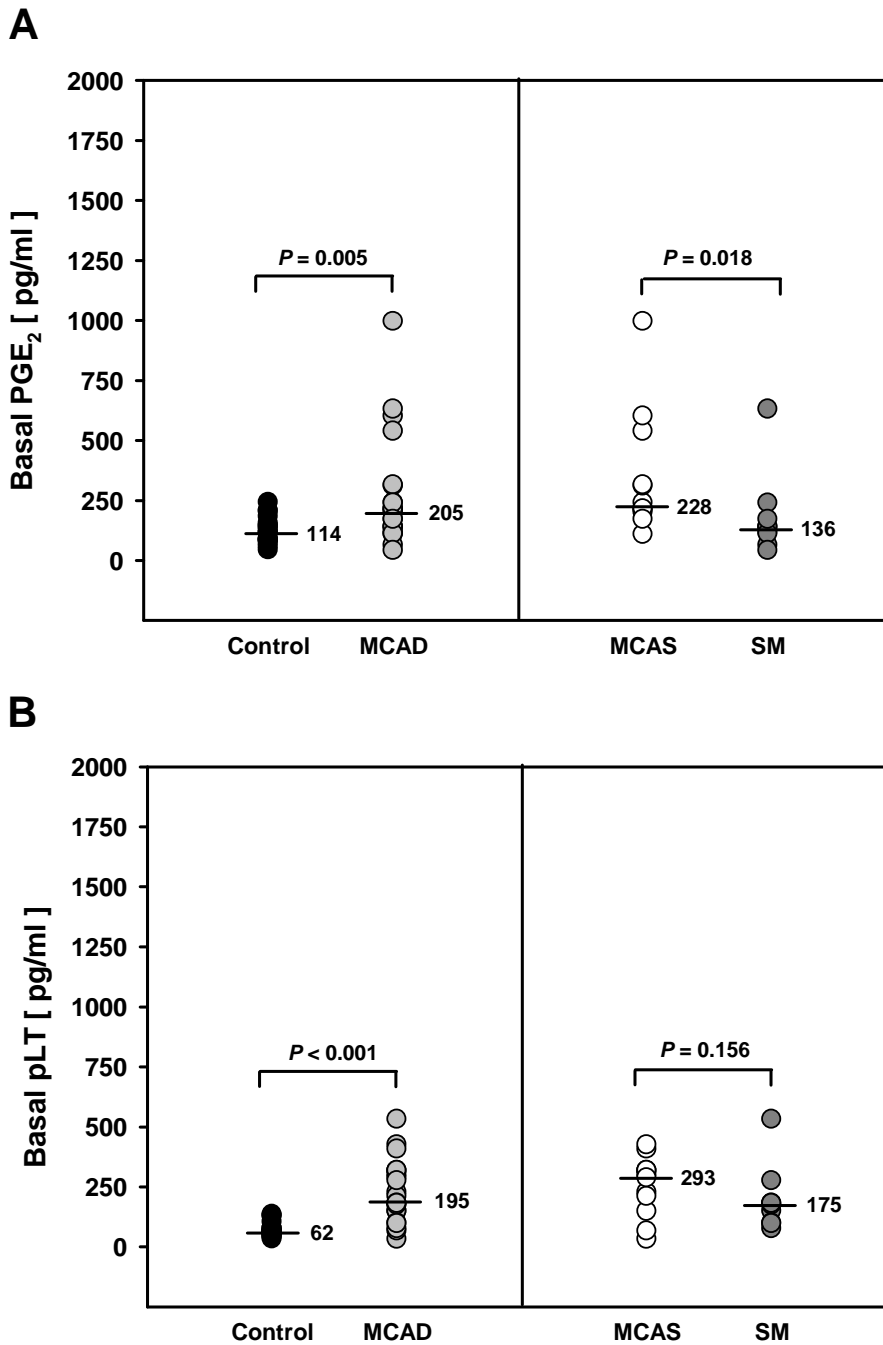

**Additional file 4: Basal release of PGE<sub>2</sub> and pLT from PBLs of MCAD patients.** Data represent (A) individual PGE<sub>2</sub> levels and (B) individual pLT levels of MCAD patients and healthy controls and the derived group medians (black horizontal lines). Data were statistically analysed using the Mann-Whitney *U* test, because of in part not normally distributed data. Control: healthy individuals (n = 20), MCAD: patients with mast cell activation disease (n = 22); MCAS: MCAD patients with mast cell activation syndrome (n = 12); SM: MCAD patients with systemic mastocytosis (n = 10).
