# Supplementary material for: Prostaglandin D2-supplemented “functional eicosanoid testing and typing” assay with peripheral blood leukocytes as a new tool in the diagnosis of systemic mast cell activation disease: an explorative diagnostic study
Source: Springer Nature journal article supplement (doi:10.1186/s12967-014-0213-2), 2014-08-11
Supplement: MOESM6 [file 9766288]

**Additional file 6:** Different medications and stimulation by arachidonic acid (AA), acetylsalicylic acid (ASA), and substance P (SP) of PGE<sub>2</sub>, pLT and PGD<sub>2</sub> release.

**Arachidonic acid (AA) stimulation, qualitative evaluation:**

| Medication & Patient                    | Eicosanoid       |     |                  |
|-----------------------------------------|------------------|-----|------------------|
|                                         | PGE <sub>2</sub> | pLT | PGD <sub>2</sub> |
| <b>H1-RA</b>                            |                  |     |                  |
| MCAS 7                                  | ↓                | →   | ↓                |
| SM 5                                    | →                | →   | →                |
| <b>H1-RA + ASA</b>                      |                  |     |                  |
| MCAS 8                                  | →                | ↓   | ↑                |
| <b>H1-RA + DNCG + H2-RA</b>             |                  |     |                  |
| MCAS 5                                  | ↑                | →   | ↑                |
| SM 4                                    | ↑                | ↑   | →                |
| SM 3                                    | ↓                | ↑   | →                |
| <b>H1-RA + DNCG + H2-RA + LT-RA</b>     |                  |     |                  |
| SM 2                                    | →                | ↑   | ↑                |
| SM 6                                    | →                | →   | ↓                |
| SM 1 (- DNCG)                           | ↑                | ↑   | ↑                |
| <b>H1-RA + DNCG + H2-RA + Ibuprofen</b> |                  |     |                  |
| SM 8                                    | ↑                | →   | ↓                |
| <b>Prednisolone</b>                     |                  |     |                  |
| SM 7                                    | ↑                | ↑   | ↑                |
| SM 10                                   | ↑                | →   | ↑                |

MCAS: mast cell activation disease; SM: systemic mastocytosis; H1-RA: H1-receptor antagonist; H2-RA: H2-receptor antagonist; AA: arachidonic acid; DNCG: cromoglicic acid disodium salt; LT-RA: leukotriene-receptor antagonist; ↑ : increase, ↓ : decrease, or → : no significant effect after stimulation with AA, as compared to basal release.

## Acetylsalicylic acid (ASA), qualitative evaluation:

| Medication & Patient                    | Eicosanoid       |     |                  |
|-----------------------------------------|------------------|-----|------------------|
|                                         | PGE <sub>2</sub> | pLT | PGD <sub>2</sub> |
| <b>H1-RA</b>                            |                  |     |                  |
| MCAS 7                                  | ↓                | →   | ↓                |
| SM 5                                    | ↓                | ↑   | →                |
| <b>H1-RA + ASA</b>                      |                  |     |                  |
| MCAS 8                                  | ↑                | ↑   | ↑                |
| <b>H1-RA + DNCG + H2-RA</b>             |                  |     |                  |
| MCAS 5                                  | ↓                | →   | ↑                |
| SM 4                                    | ↑                | ↑   | →                |
| SM 3                                    | ↓                | ↑   | ↑                |
| <b>H1-RA + DNCG + H2-RA + LT-RA</b>     |                  |     |                  |
| SM 2                                    | →                | →   | →                |
| SM 6                                    | →                | ↑   | ↓                |
| SM 1 (- DNCG)                           | →                | ↑   | ↑                |
| <b>H1-RA + DNCG + H2-RA + Ibuprofen</b> |                  |     |                  |
| SM 8                                    | ↑                | ↑   | ↓                |
| <b>Prednisolone</b>                     |                  |     |                  |
| SM 7                                    | ↓                | ↑   | ↑                |
| SM 10                                   | ↑                | ↑   | ↓                |

MCAS: mast cell activation disease; SM: systemic mastocytosis; H1-RA: H1-receptor antagonist; H2-RA: H2-receptor antagonist; ASA: acetylsalicylic acid; DNCG: cromoglicic acid disodium salt; LT-RA: leukotriene-receptor antagonist; ↑ : increase, ↓ : decrease, or → : no significant effect after stimulation with ASA, as compared to basal release.

### Substance P (SP), qualitative evaluation:

| Medication & Patient                    | Eicosanoid       |     |                  |
|-----------------------------------------|------------------|-----|------------------|
|                                         | PGE <sub>2</sub> | pLT | PGD <sub>2</sub> |
| <b>H1-RA</b>                            |                  |     |                  |
| MCAS 7                                  | ↓                | ↑   | ↑                |
| SM 5                                    | ↑                | ↑   | ↑                |
| <b>H1-RA + ASA</b>                      |                  |     |                  |
| MCAS 8                                  | ↑                | →   | ↓                |
| <b>H1-RA + DNCG + H2-RA</b>             |                  |     |                  |
| MCAS 5                                  | ↓                | ↓   | ↓                |
| SM 4                                    | ↑                | ↑   | ↑                |
| SM 3                                    | ↑                | ↑   | ↑                |
| <b>H1-RA + DNCG + H2-RA + LT-RA</b>     |                  |     |                  |
| SM 2                                    | ↑                | →   | ↑                |
| SM 6                                    | ↑                | ↑   | ↑                |
| SM 1 (- DNCG)                           | ↑                | ↓   | ↑                |
| <b>H1-RA + DNCG + H2-RA + Ibuprofen</b> |                  |     |                  |
| SM 8                                    | ↑                | ↑   | ↑                |
| <b>Prednisolone</b>                     |                  |     |                  |
| SM 7                                    | ↑                | ↑   | ↑                |
| SM 10                                   | ↑                | ↑   | ↑                |

MCAS: mast cell activation disease; SM: systemic mastocytosis; H1-RA: H1-receptor antagonist; H2-RA: H2-receptor antagonist; SP: substance P; DNCG: cromoglicic acid disodium salt; LT-RA: leukotriene-receptor antagonist; ↑ : increase, ↓ : decrease, or → : no significant effect after stimulation with SP, as compared to basal release.
